# Supplementary material for: Connexin 43 Loss in Endothelial Progenitors Facilitates Functional Airway Adaptation After Lung Injury
Source: Research Square preprint supplement (doi:10.21203/rs.3.rs-9727235/v1), 2026-06-09
Supplement: Supplementary file 1 [file b1333578f676ae30907c302c.pdf]

# Cx43 Western Blot Human ABCG2hi EPC Control and IPF

JH May 15, 2026

# Sample Information

- Samples were human cell culture primary lines - 4 controls, 4 IPF (independent patients)
  - 1 aliquot thawed for both gels; 30uL/well, 20ug of protein/sample
  - Samples were tested via BCA assay and immediately aliquoted for Westerns, no freeze-thaw in between.
- Samples used and passage # at time of collection:
  - Controls:
    - VA-HD-06, Passage 15
    - IPF23K, Passage 16
    - VU-HD-11, Passage 15
    - VU-HD-07, Passage 15
  - IPF:
    - VA-IPF-12, Passage 17
    - VU-IPF-16 upper, Passage 15
    - VU-IPF-16 lower, Passage 16
    - VU-IPF-25, Passage 15

|        |  | Gel Layout |          |         |          |          |           |                    |                    |           |        |
|--------|--|------------|----------|---------|----------|----------|-----------|--------------------|--------------------|-----------|--------|
| Lane   |  | 1          | 2        | 3       | 4        | 5        | 6         | 7                  | 8                  | 9         | 10     |
| Sample |  | Ladder     | VA-HD-06 | IPF237K | VU-HD-11 | VU-HD-07 | VA-IPF-25 | VU-IPF-16<br>upper | VU-IPF-16<br>lower | VU-IPF-12 | Ladder |

# B-Actin- post Cx43

Primary AB: B-Actin Cat:#4970 (Cell Signaling Technologies)

Primary AB Dilution: 1:1000

Blocker: 5% Milk in TBST

Secondary AB: Goat Anti-Rabbit Ig HRP Conjugated Cat # AP187p (CST)

Secondary AB Dilution: 1:10,000

Molecular Weight: 45 kDa

Gel: V for mins MOPS Buffer

Ladder: Precision Plus Protein™ Kaleidoscope™ Prestained Protein

Standards #1610375 load 10 uL

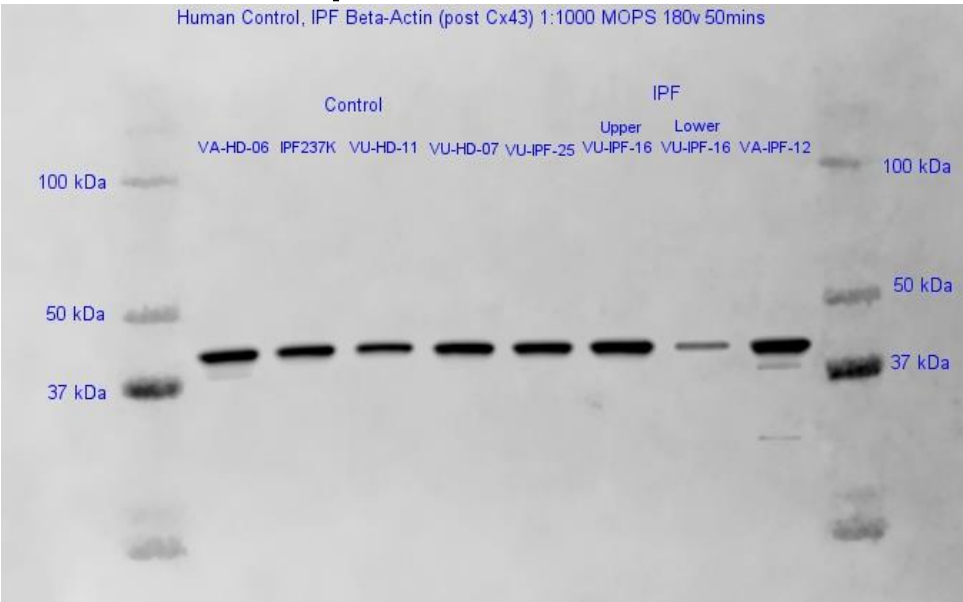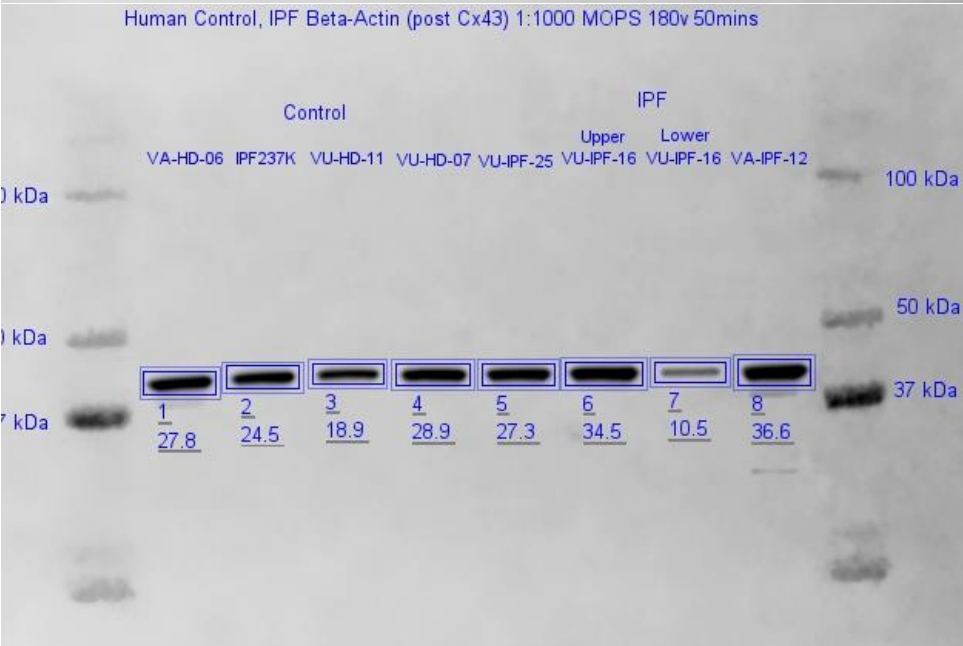

| Group   | Sample          | Protein [ug/ul] | 20ug       | uL needed |
|---------|-----------------|-----------------|------------|-----------|
| control | VA-HD-06        | 3071.510961     | 0.00651145 | 6.511453  |
| control | IPF237K         | 2461.354046     | 0.00812561 | 8.125609  |
| control | VU-HD-11        | 2468.715177     | 0.00810138 | 8.10138   |
| control | VU-HD-07        | 2964.036962     | 0.00674755 | 6.747554  |
| IPF     | VA-IPF-12       | 3337.664784     | 0.00599221 | 5.992214  |
| IPF     | VU-IPF-16 upper | 2477.547917     | 0.0080725  | 8.072498  |
| IPF     | VU-IPF-16 lower | 2370.009301     | 0.00843879 | 8.438785  |
| IPF     | VA-IPF-25       | 2801.418222     | 0.00713924 | 7.139241  |

| Image Name | Channel | Name  | Signal     | Total      | Area | Bkgnd.     | Type   |
|------------|---------|-------|------------|------------|------|------------|--------|
| 0000582_01 | Chemi   | 00001 | 27.844965  | 33.0456161 | 720  | 0.00722313 | Signal |
| 0000582_01 | Chemi   | 00002 | 24.4825134 | 29.2121277 | 720  | 0.00656891 | Signal |
| 0000582_01 | Chemi   | 00003 | 18.9415989 | 22.7518864 | 658  | 0.00579071 | Signal |
| 0000582_01 | Chemi   | 00004 | 28.898056  | 33.7546425 | 750  | 0.00647545 | Signal |
| 0000582_01 | Chemi   | 00005 | 27.3062115 | 32.6684837 | 735  | 0.00729561 | Signal |
| 0000582_01 | Chemi   | 00006 | 34.5086517 | 41.1832123 | 832  | 0.00802231 | Signal |
| 0000582_01 | Chemi   | 00007 | 10.5294285 | 13.5479221 | 672  | 0.00449181 | Signal |
| 0000582_01 | Chemi   | 00008 | 36.6013145 | 43.942791  | 882  | 0.00832367 | Signal |

# Cx43

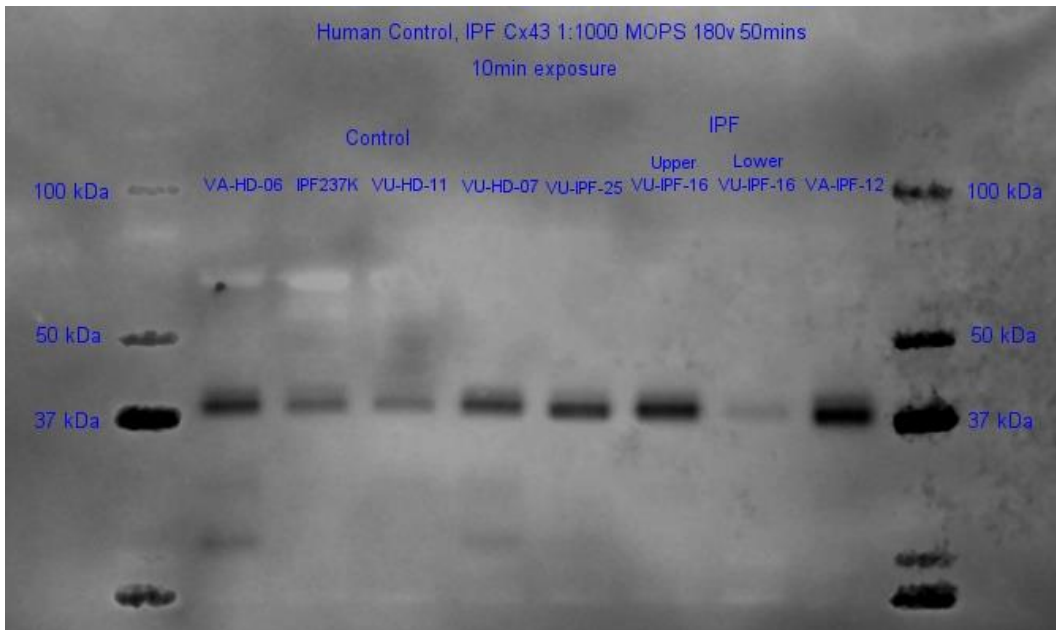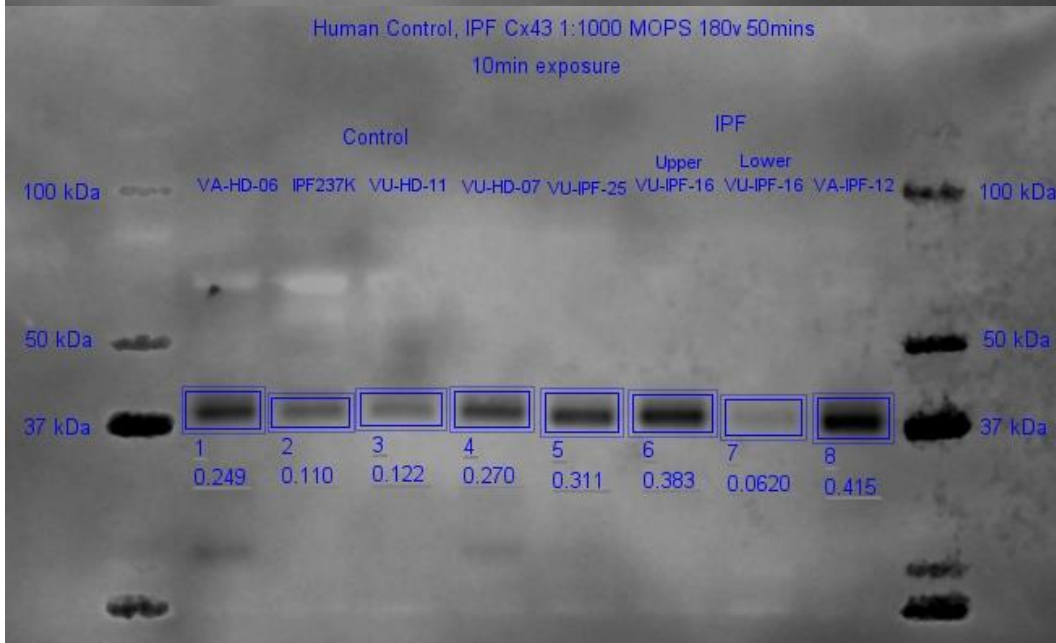

Primary AB: Connexin43 Cat:#3512 (CST)

Primary AB Dilution: 1:1000

Blocker: 5% Milk in TBST

Secondary AB: Goat Anti-Rabbit Ig HRP Conjugated Cat # AP187p (CST)

Secondary AB Dilution: 1:10,000

Molecular Weight: 39, 41, 43, 44 kDA

Gel: 180V for 50 mins MOPS Buffer

Ladder: Precision Plus Protein™ Kaleidoscope™ Prestained Protein Standards #1610375 load 10 uL

| Group   | Sample          | Protein [ug/ul] | 20ug       | uL needed |
|---------|-----------------|-----------------|------------|-----------|
| control | VA-HD-06        | 3071.510961     | 0.00651145 | 6.511453  |
| control | IPF237K         | 2461.354046     | 0.00812561 | 8.125609  |
| control | VU-HD-11        | 2468.715177     | 0.00810138 | 8.10138   |
| control | VU-HD-07        | 2964.036962     | 0.00674755 | 6.747554  |
| IPF     | VA-IPF-12       | 3337.664784     | 0.00599221 | 5.992214  |
| IPF     | VU-IPF-16 upper | 2477.547917     | 0.0080725  | 8.072498  |
| IPF     | VU-IPF-16 lower | 2370.009301     | 0.00843879 | 8.438785  |
| IPF     | VA-IPF-25       | 2801.418222     | 0.00713924 | 7.139241  |

| Image Name | Channel | Name  | Signal     | Total     | Area | Bkgnd.     | Type   |
|------------|---------|-------|------------|-----------|------|------------|--------|
| 0000579_01 | Chemi   | 00001 | 0.24948597 | 1.298068  | 1128 | 0.00092959 | Signal |
| 0000579_01 | Chemi   | 00002 | 0.10953069 | 0.8870835 | 931  | 0.00083518 | Signal |
| 0000579_01 | Chemi   | 00003 | 0.1217804  | 0.9463186 | 1092 | 0.00075507 | Signal |
| 0000579_01 | Chemi   | 00004 | 0.26988268 | 1.0934796 | 1104 | 0.00074601 | Signal |
| 0000579_01 | Chemi   | 00005 | 0.31129646 | 1.1780553 | 1175 | 0.00073767 | Signal |
| 0000579_01 | Chemi   | 00006 | 0.38291645 | 1.3634462 | 1224 | 0.00080109 | Signal |
| 0000579_01 | Chemi   | 00007 | 0.06203699 | 0.9718475 | 1127 | 0.00080729 | Signal |
| 0000579_01 | Chemi   | 00008 | 0.41488981 | 1.5897021 | 1196 | 0.00098228 | Signal |
