# Supplementary material for: Connexin 43 Loss in Endothelial Progenitors Facilitates Functional Airway Adaptation After Lung Injury
Source: Research Square preprint supplement (doi:10.21203/rs.3.rs-9727235/v1), 2026-06-09
Supplement: Supplementary file 2 [file b2e0c5ba9f3df7cd9af87be5.pdf]

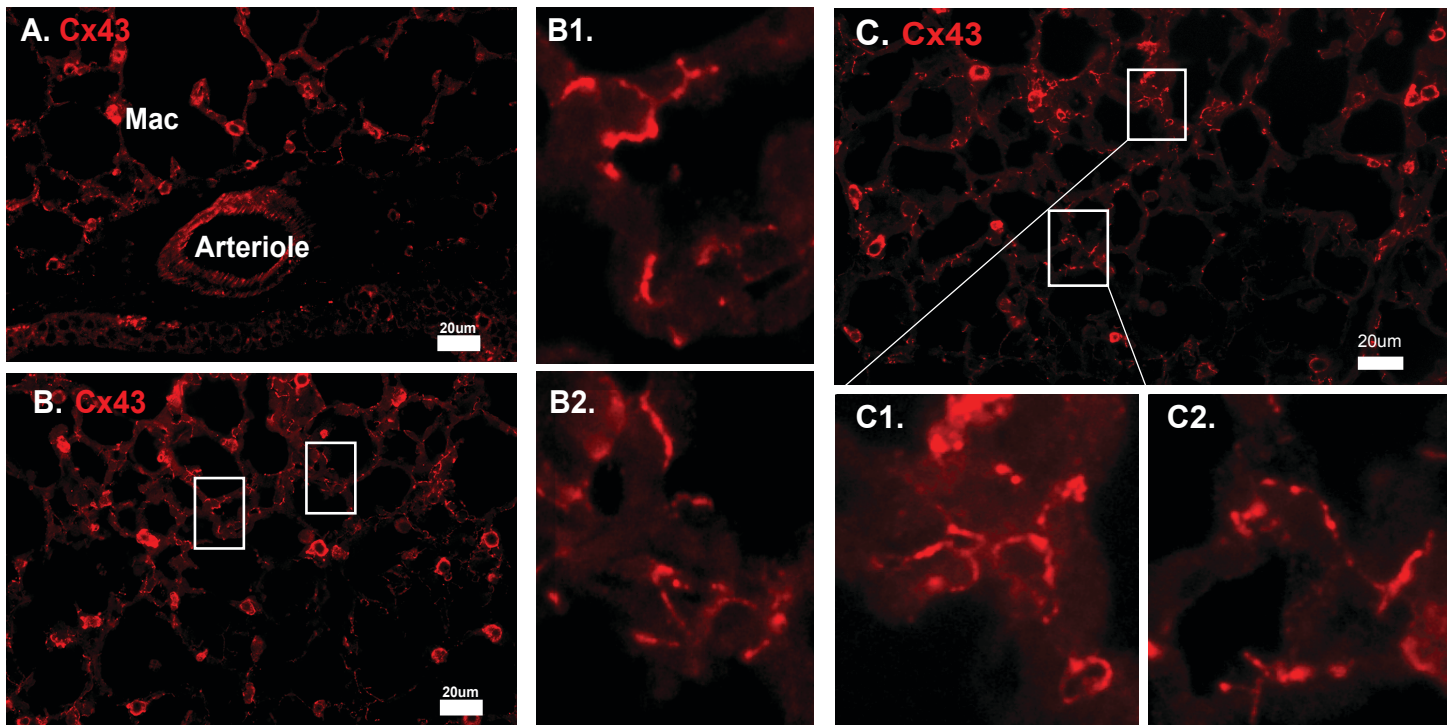

**SUPPLEMENTAL FIGURE 1. Positive controls for Cx43 immunostaining in adult mouse lung.** Immunostaining to detect Cx43 (red) in 3µm paraffin sectioned adult mouse lung tissue. **A.** Illustrated the endothelial layer of an arteriole as well as macrophages (Mac). **B,C.** Illustrated Cx43 expression in the alveolar-capillary unit. **B1,2; C1,2.** enlarged from selected areas. Scale = 20µm.

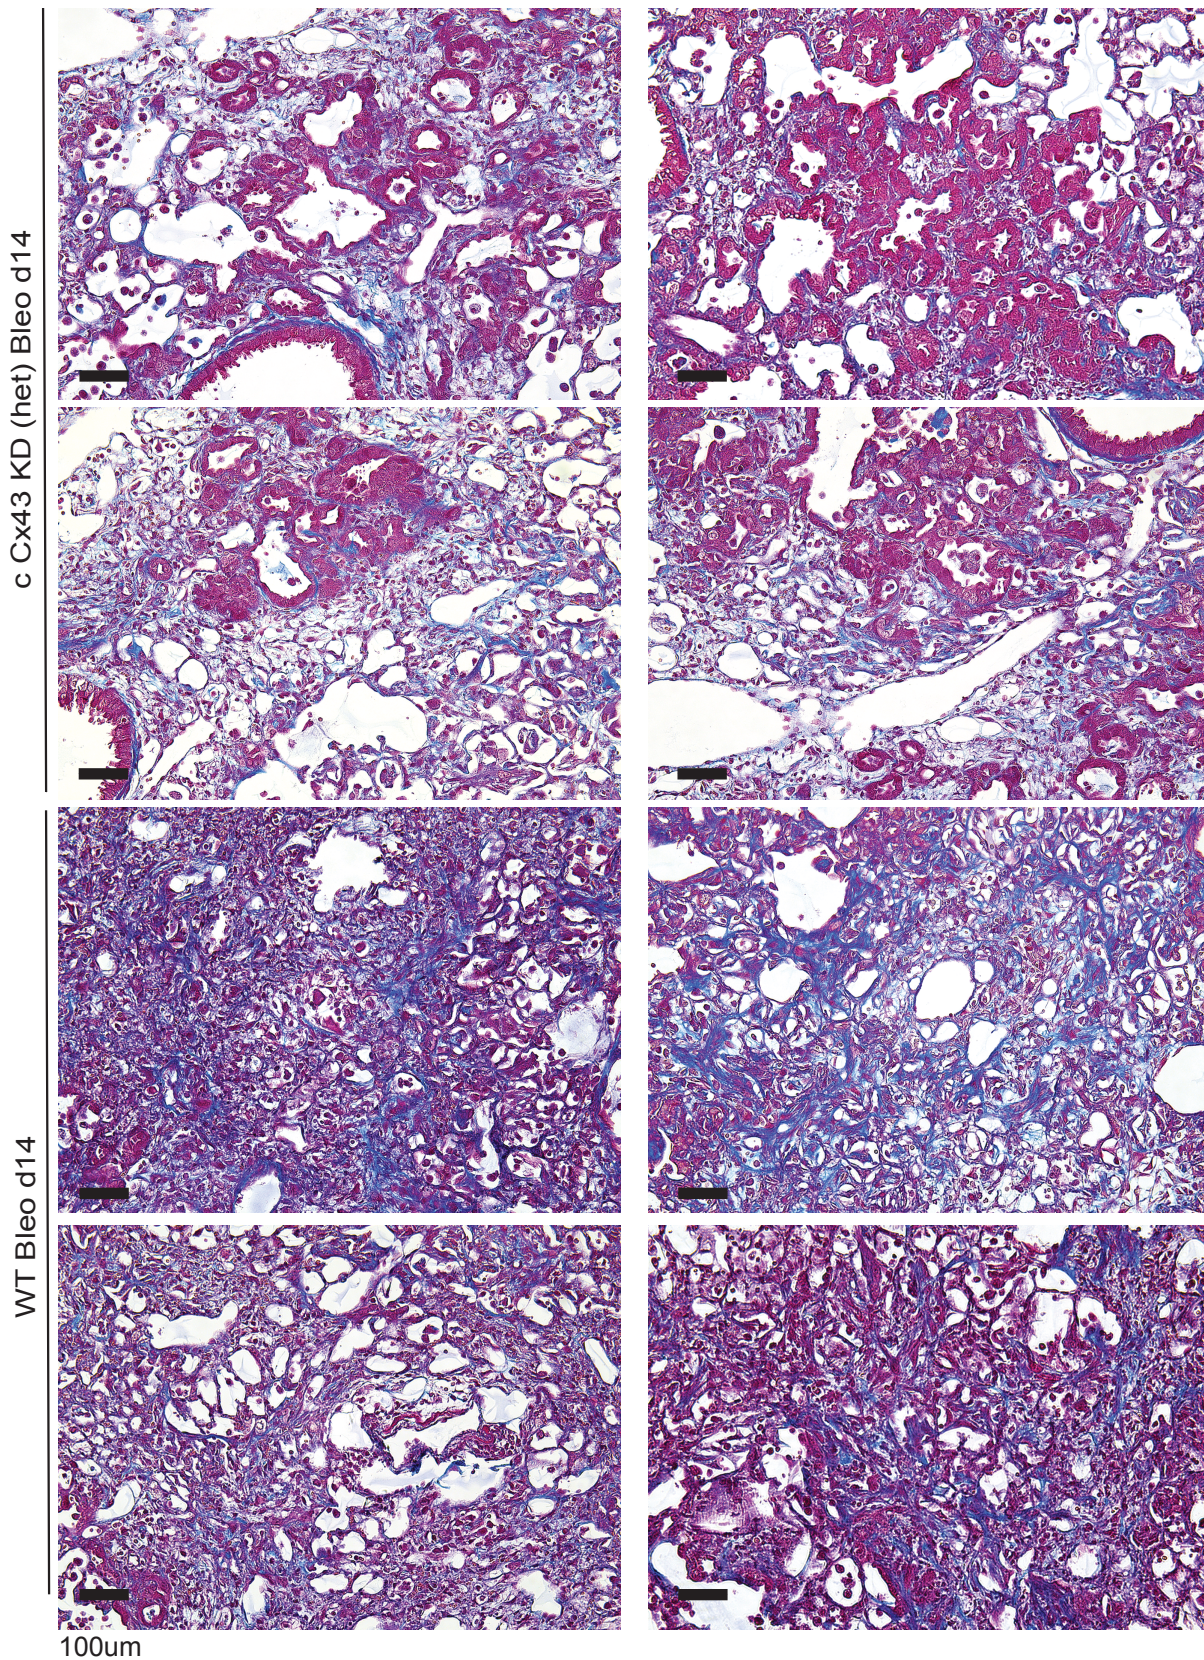

**SUPPLEMENTAL FIGURE 2. Representative images of ectopic basal cells in mouse lungs with heterozygous knockout of Cx43 in ABCG2 EPC.** Representative enlarged trichrome stained mouse lung tissue sections from cCx43KO or WT mice. n=4,4. Scale =100µm.

**A. cCx43 KO(het) PBS**

**cCx43 KO(het) Bleo**

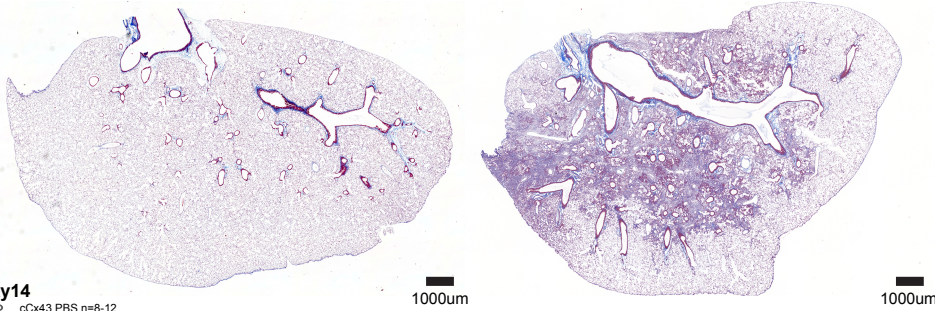

**Day14**

- cCx43 PBS n=8-12
- cCx43 Bleo n=15-18
- WT PBS n=6-17
- WT Bleo n=4-22

**1.5 Months**

- △ cCx43 PBS n=8
- ▲ cCx43 Bleo n=10-14
- △ WT PBS n=7-12
- ▲ WT Bleo n=4-9

**3 Months**

- cCx43 PBS n=3
- cCx43 Bleo n=1-5
- WT PBS n=4
- WT Bleo n=4-9

**B. Harvest Weights**

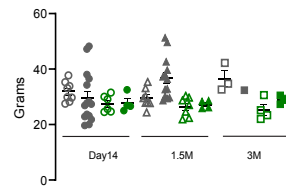

**C. RV/LV+S**

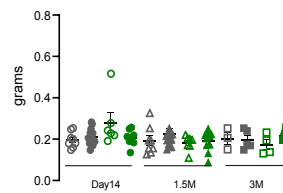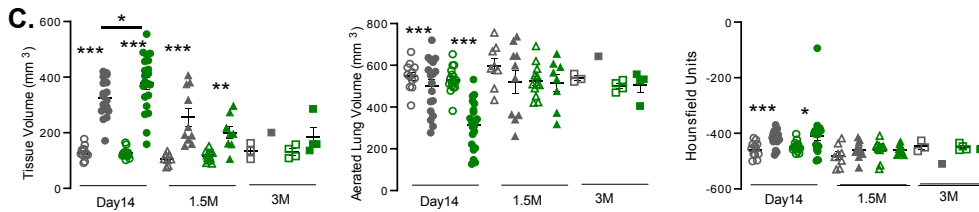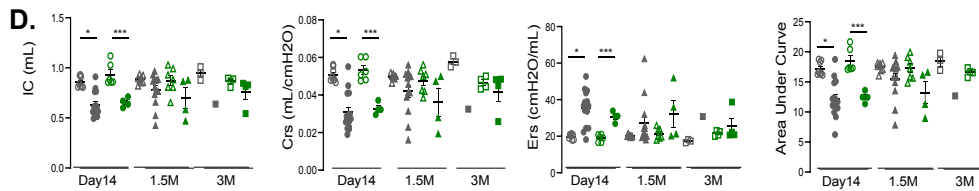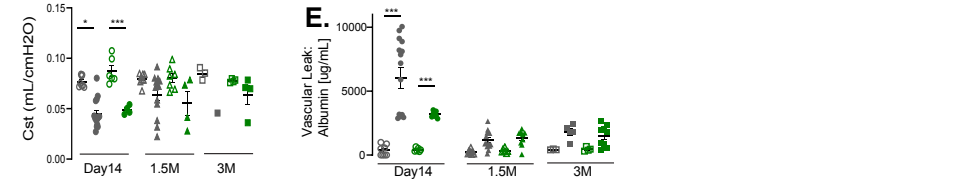

**F. DTA PBS Vehicle D14**

**G. DTA Bleomycin D14**

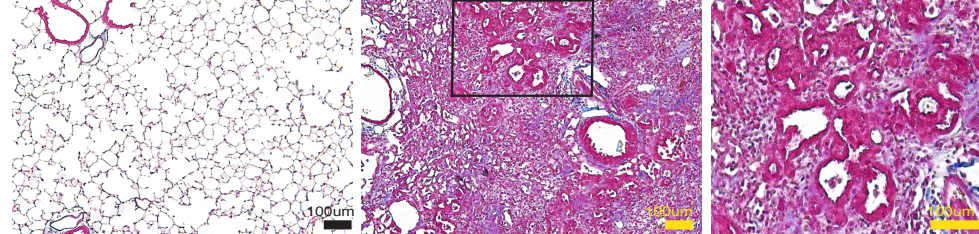

**SUPPLEMENTAL FIGURE 3. The adaptive epithelial response to fibrotic injury resolves over time similar to WT.** Mice were induced with a single low dose tamoxifen, 2 weeks later vehicle or bleomycin was instilled o.p. and mice harvested on day-14, 1 month and 3 month time points for analysis. **A.** Representative stitched images of cCx43KO mouse lung tissue sections. Scale =1000µm. n per group and key. **B.** Mouse weight and Fulton's index at time of harvest. **C.** MicroCT endpoints. **D.** Airway physiological measurements taken using a Flexivent. **E.** Vascular leak quantitated by albumin present in the BAL. Nonparametric one way Anova was used to define significance, \*p<0.05, \*\* p<0.01, \*\*\* p<0.001. **F&G.** ABCG2CreERT2x fISTOP DTA mice were mice harvested on day-14 post PBS vehicle or bleomycin injury and trichrome staining performed. Scale =100µm.

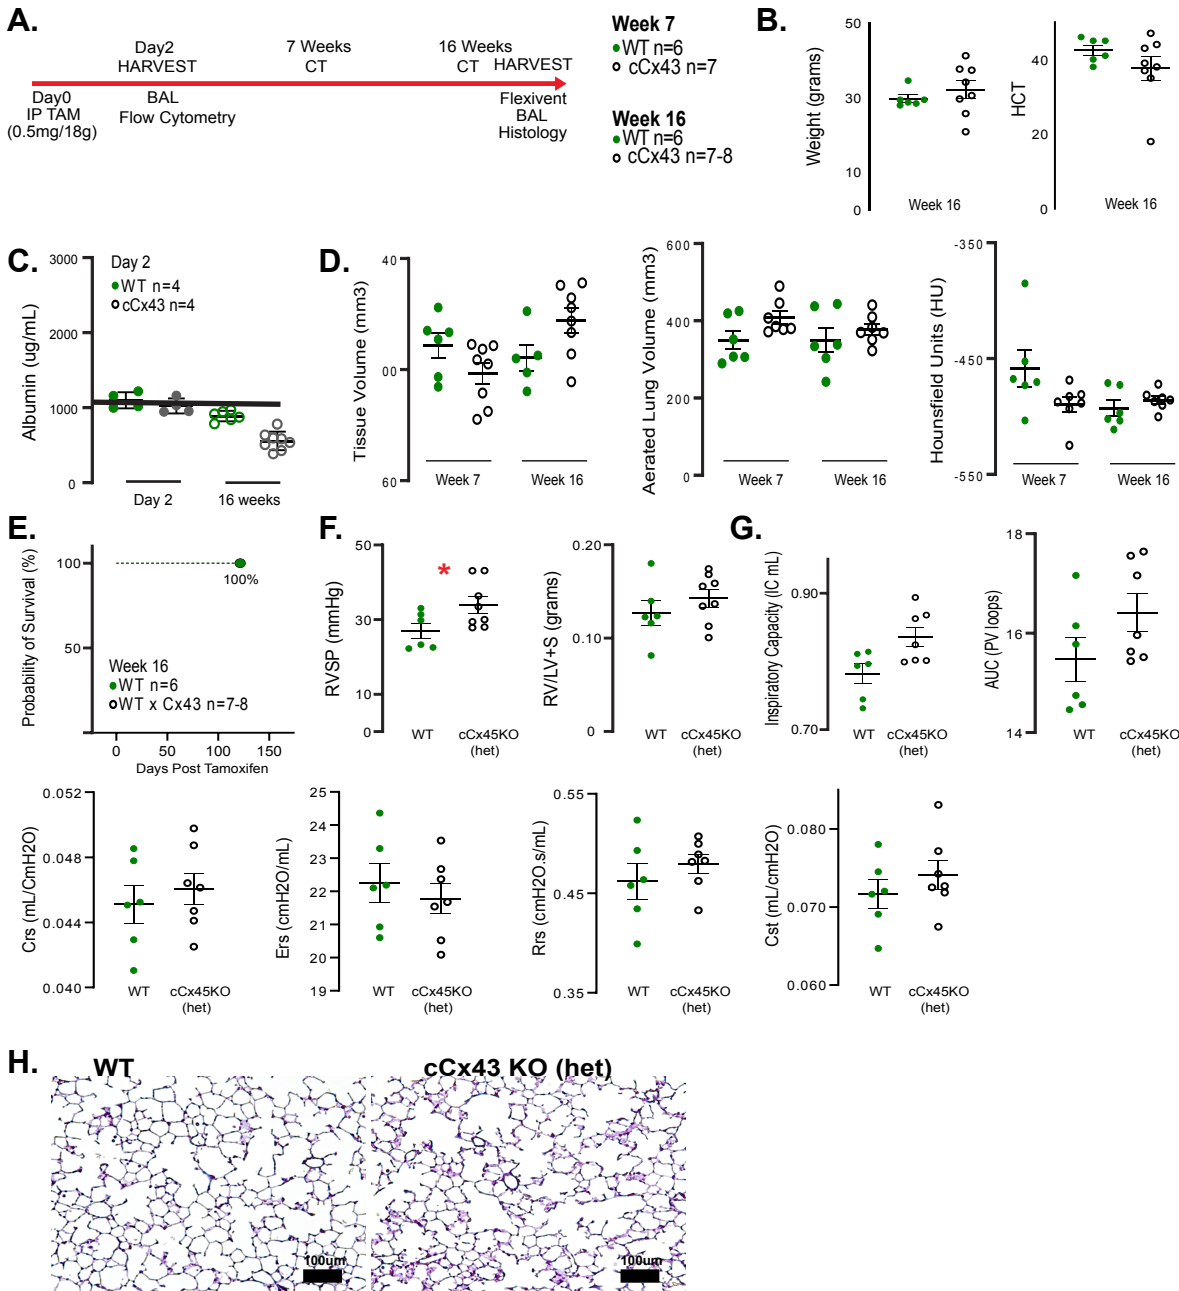

**SUPPLEMENTAL FIGURE 4. Heterozygous knockout of Cx43 in ABCG2 EPC does not significantly change the baseline phenotype and function of mouse lungs while ABCG2-eGFP EPC are decreased.** **A.** Schematic of the experimental design, n per group and key. **B.** Mouse weight and hematocrit (HCT) at time of harvest. **C.** Vascular leak quantitated by albumin present in the BAL. **D.** MicroCT endpoints. **E.** Mean survival of mice at harvest. **F.** Right ventricular systolic pressure (RVSP) was increased in the cCx43KO mice in the absence of right ventricular hypertrophy (RV/LV+S). **G.** Airway physiological measurements taken using a Flexivent. Nonparametric one way Anova or unpaired Welch's t-test was used to define significance, \*p<0.05, \*\* p<0.01, \*\*\* p<0.001. **H.** H&E stained paraffin tissue sections from agarose inflated mouse lungs at harvest. Scale = 100µm.

## Supplemental Table 1. Reagent List

| Antibody                                                      | Vendor                    | Catalog #                | Dilution                 |
|---------------------------------------------------------------|---------------------------|--------------------------|--------------------------|
| B-Actin                                                       | Cell Signaling Technology | 4970                     | 1:1000                   |
| Goat Anti-Rabbit IgG HRP-Conjugate, Species Adsorbed          | Millipore Sigma           | AP187p                   | 1:10,000                 |
| Horse Anti-Mouse IgG HRP-Linked                               | Cell Signaling Technology | 7076                     | 1:1000                   |
| Connexin 43                                                   | Cell Signaling Technology | 3512S                    | 1:1000 (WB)<br>1:50 (IF) |
| SOX2                                                          | R&D Systems               | AF2018                   | 1:200                    |
| Rabbit Anti-Goat IgG HRP Conjugated                           | Millipore Sigma           | AP106P                   | 1:10,000                 |
| Human <i>GJA1</i>                                             | Thermo Fisher Scientific  | 4331182<br>Hs00748445_s1 |                          |
| Human GAPDH                                                   | Thermo Fisher Scientific  | 4331182<br>Hs02786624_g1 |                          |
| GFP                                                           | Antibodies Inc.           | GFP-1010                 | 1:500 (IF)               |
| <i>Lycopersicon esculentum</i> tomato Lectin (LEL)-Dylight649 | Vector Laboratories Inc.  | DL-1178-1                | 100ug/mouse              |
|                                                               |                           |                          |                          |
| Taqman RNA-to-Ct 1-Step Kit                                   | Thermo Fisher Scientific  | 4392938                  |                          |
| RNeasy Mini Kit                                               | Qiagen                    | 74104                    |                          |
| TaqMan Fast Advanced Cells-To-CT Kit                          | Invitrogen                | A35374                   |                          |
| RIPA Buffer                                                   | Cell Signaling Technology | 9806S                    |                          |
| Halt protease and phosphatase inhibitors                      | Thermo Fisher Scientific  | 78444                    |                          |
| Pierce BCA Protein Assay Kit                                  | Thermo Fisher Scientific  | 23227                    |                          |
| 1.5mm thick NuPAGE 4-12% Bis-Tris gels                        | Thermo Fisher Scientific  | NP0335BOX                |                          |
| Clarity Western ECL Substrate                                 | BioRad                    | 170-5060                 |                          |
| Laemmli Sample Buffer                                         | BioRad                    | 1610747                  |                          |
